# Supplementary material
Source: PubMed Central journal article supplement (PMC6304669)
Supplement: 61ba269c4d8a92156d67f6cb5c2f8e70_JB.00431-18-s0001.pdf [file 61ba269c4d8a92156d67f6cb5c2f8e70_JB.00431-18-s0001.pdf]

### (A) UxuL proteins from the PF08450 family

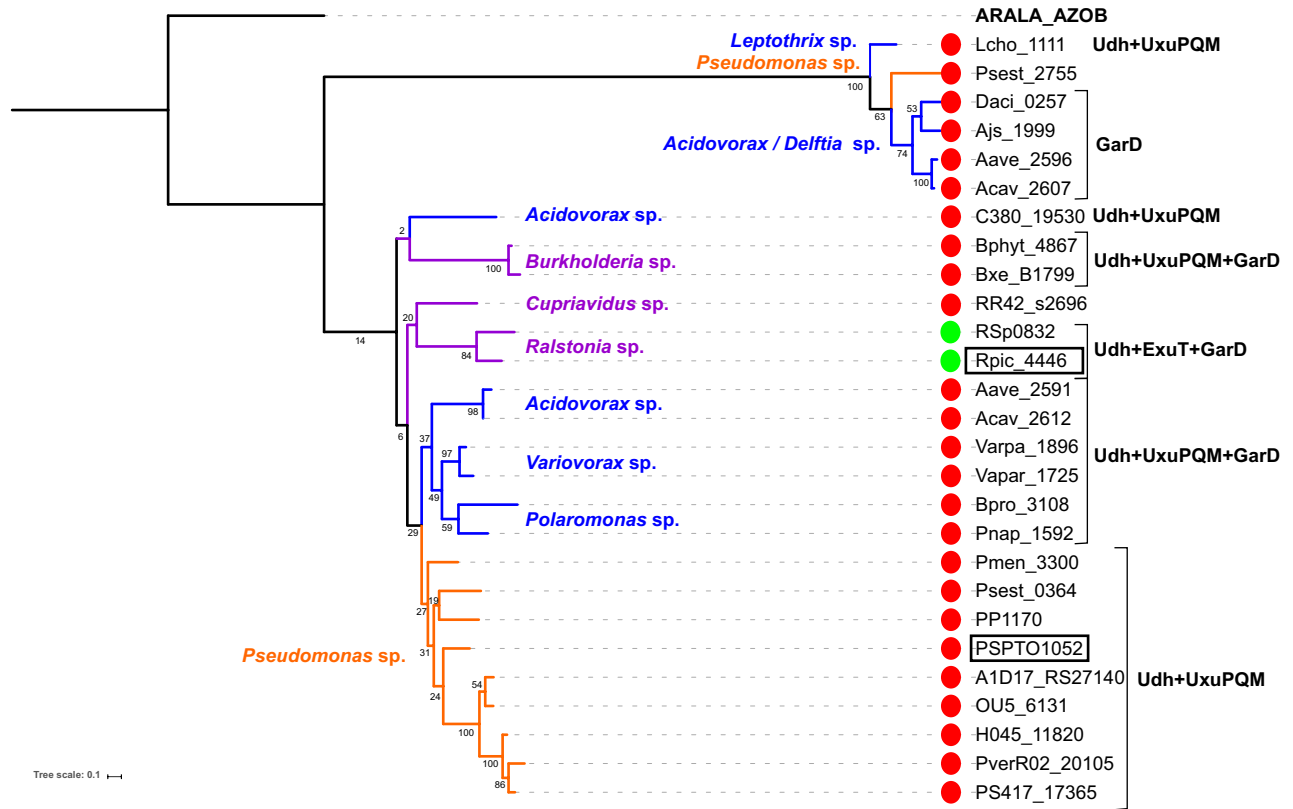

### (B) UxuF proteins from the PF10282 family

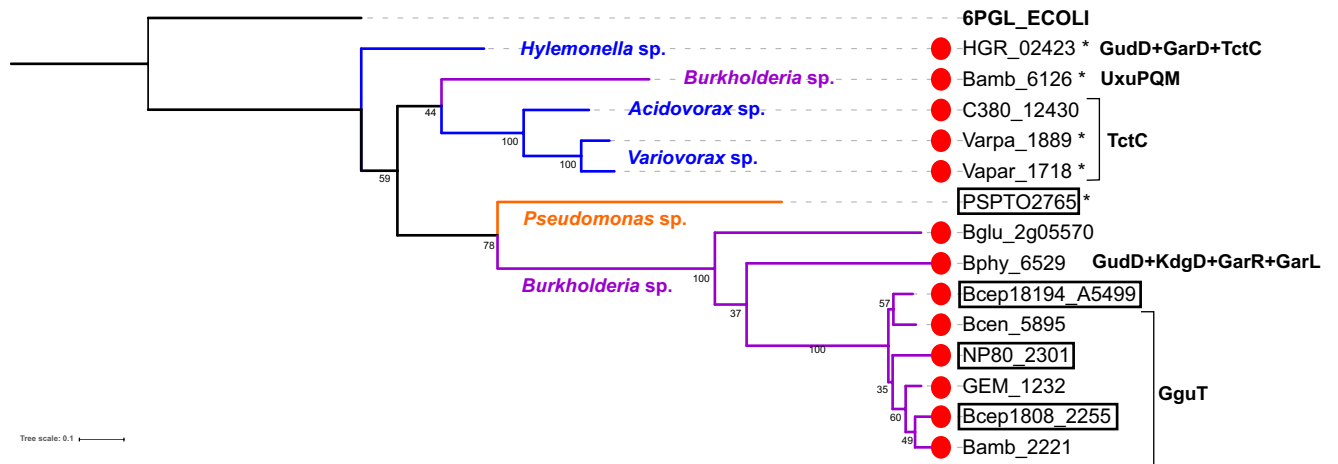

**Taxonomic groups:** Comamonadaceae, Burkholderiaceae, Pseudomonadaceae

### FIG S1. Maximum likelihood phylogenetic trees of novel UxuF and UxuL lactonases.

The tree was constructed using the PhyML software; the bootstrap values (100 replicates) are shown for each node.

Representative previously characterized lactonases from both families included as outgroups are in bold:

6-phosphogluconolactonase from *Escherichia coli* (6PGL\_ECOLI), L-arabinolactonase from *Azospirillum brasilense* (ARALA\_AZOB).

Lactonase genes from the reconstructed GguR and GulR regulons are marked with red ● and green ● circles.

Enzymes biochemically characterized in this work are boxed (   ).

Secreted enzymes as predicted using the SignalP software are marked with asterisk (\*).

Genomic clustering of *uxuL* and *uxuF* with other hexuronate utilization genes is shown on the right.

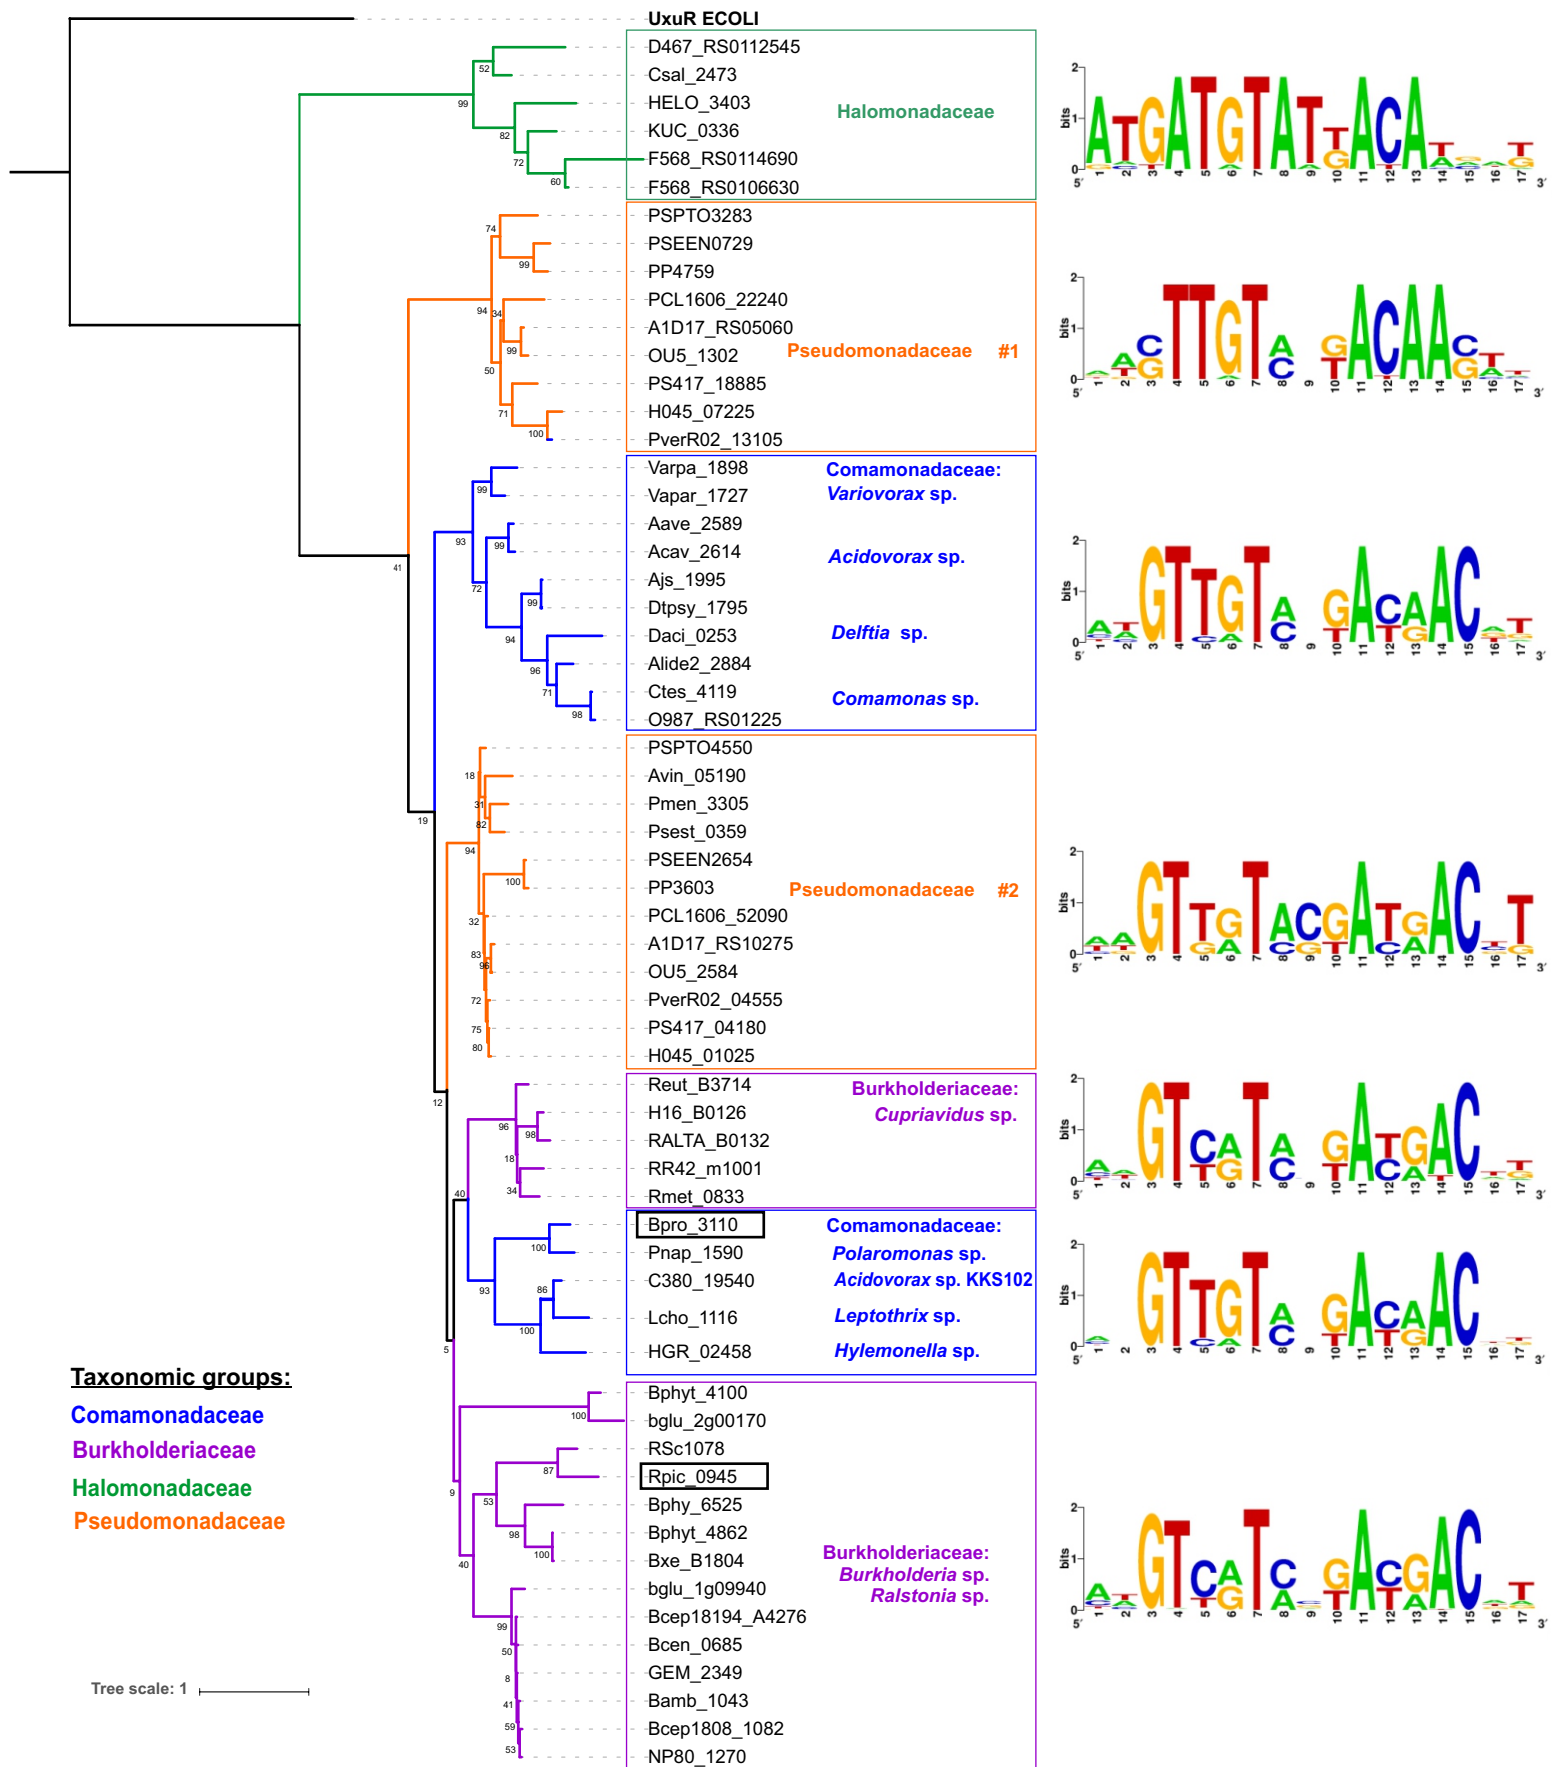

**FIG S2. Maximum likelihood phylogenetic tree of the GguR regulators and their DNA motifs.**

The tree was constructed using the PhyML software; the bootstrap values (100 replicates) are shown for each node.

Regulators characterized in this work are boxed ( Rpic\_0945 ). DNA motifs constructed using the WebLogo tool.

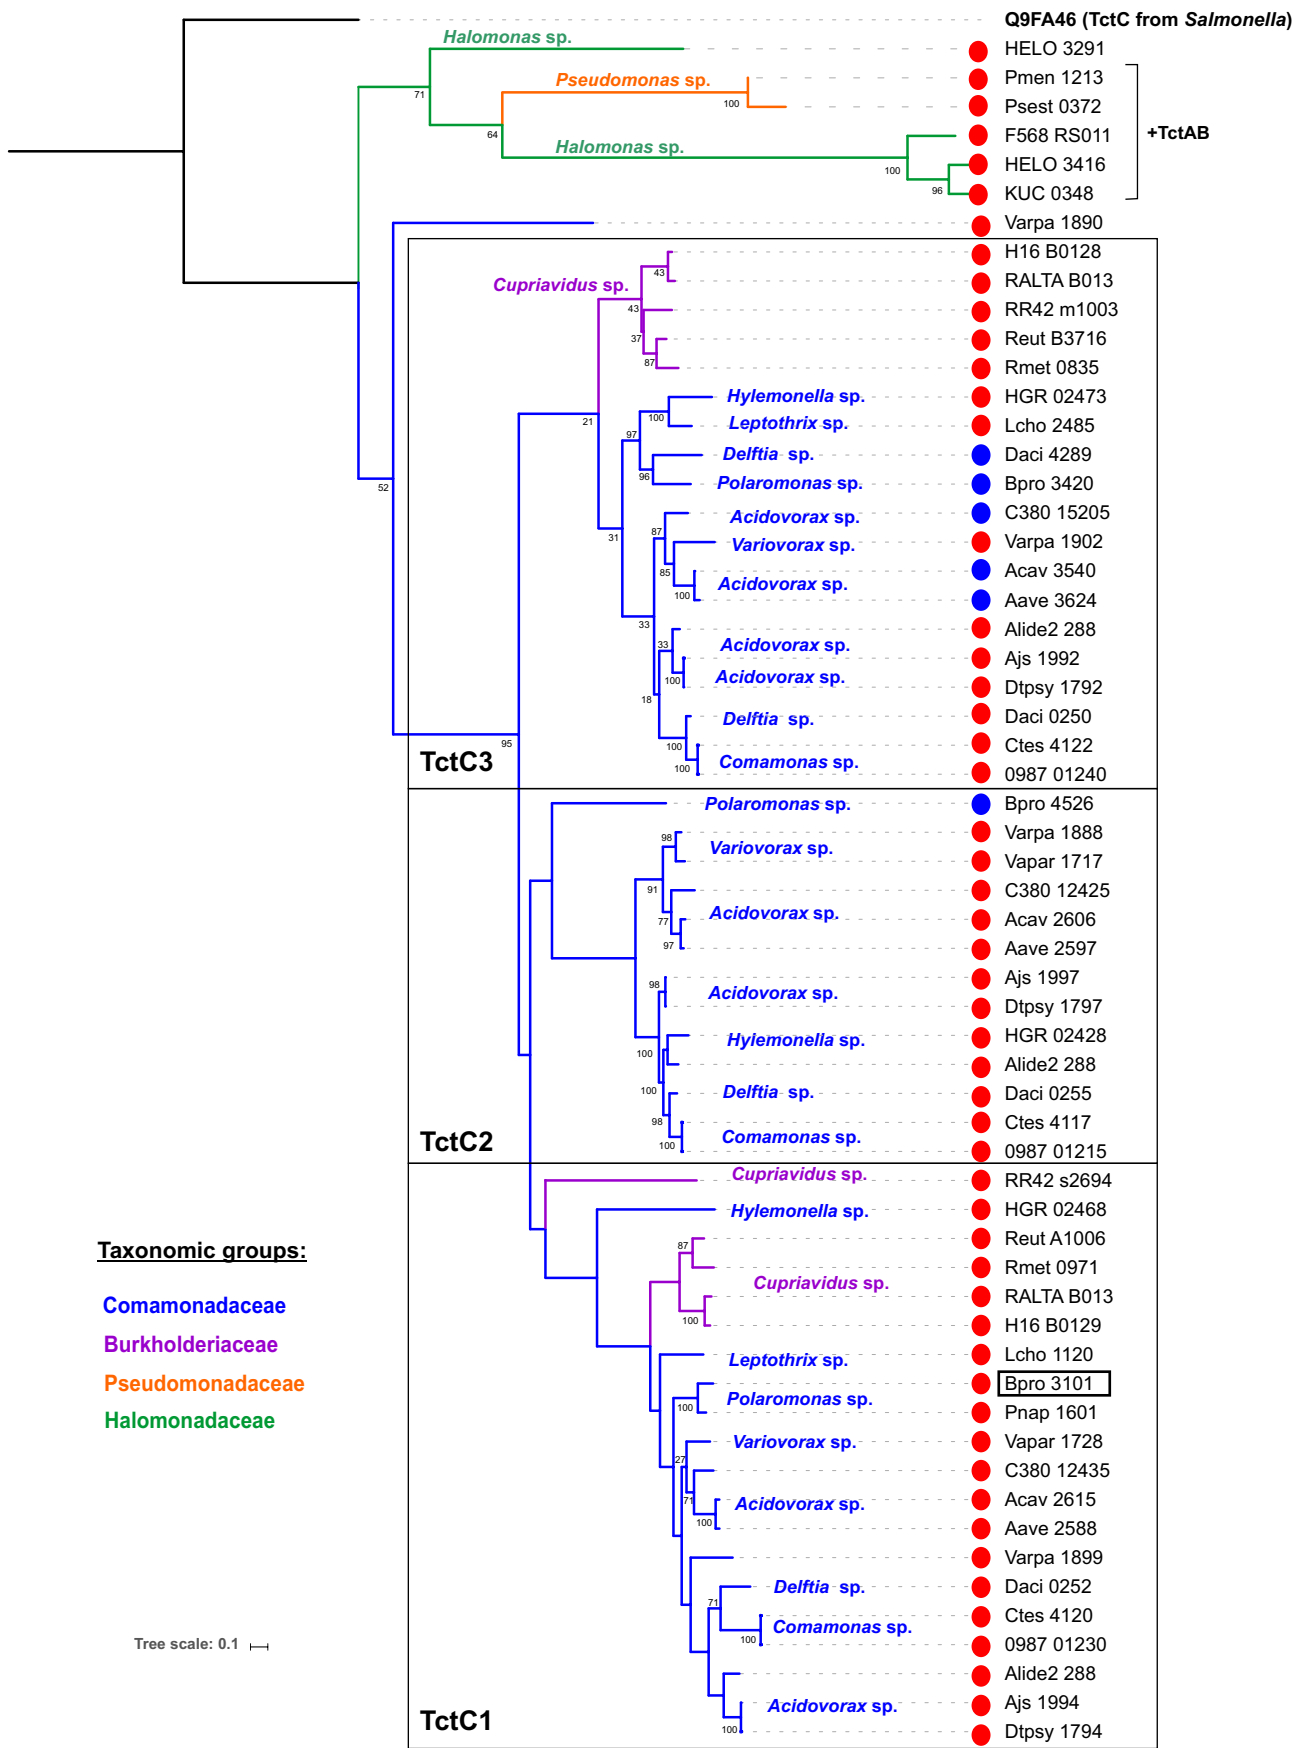

**FIG S3. Maximum likelihood phylogenetic tree of novel aldarate transporters TctC.**

The tree was constructed using the PhyML software; the bootstrap values (100 replicates) are shown for each node.

Previously characterized TctC protein from *Salmonella* was included as outgroup.

*tctC* genes from the reconstructed GguR and GudR regulons are marked with red ● and blue ● circles.

Experimentally characterized in this work D-glucarate binding TctC protein is boxed.

Genomic clustering of *tctC* with other aldarate utilization genes is shown on the right.

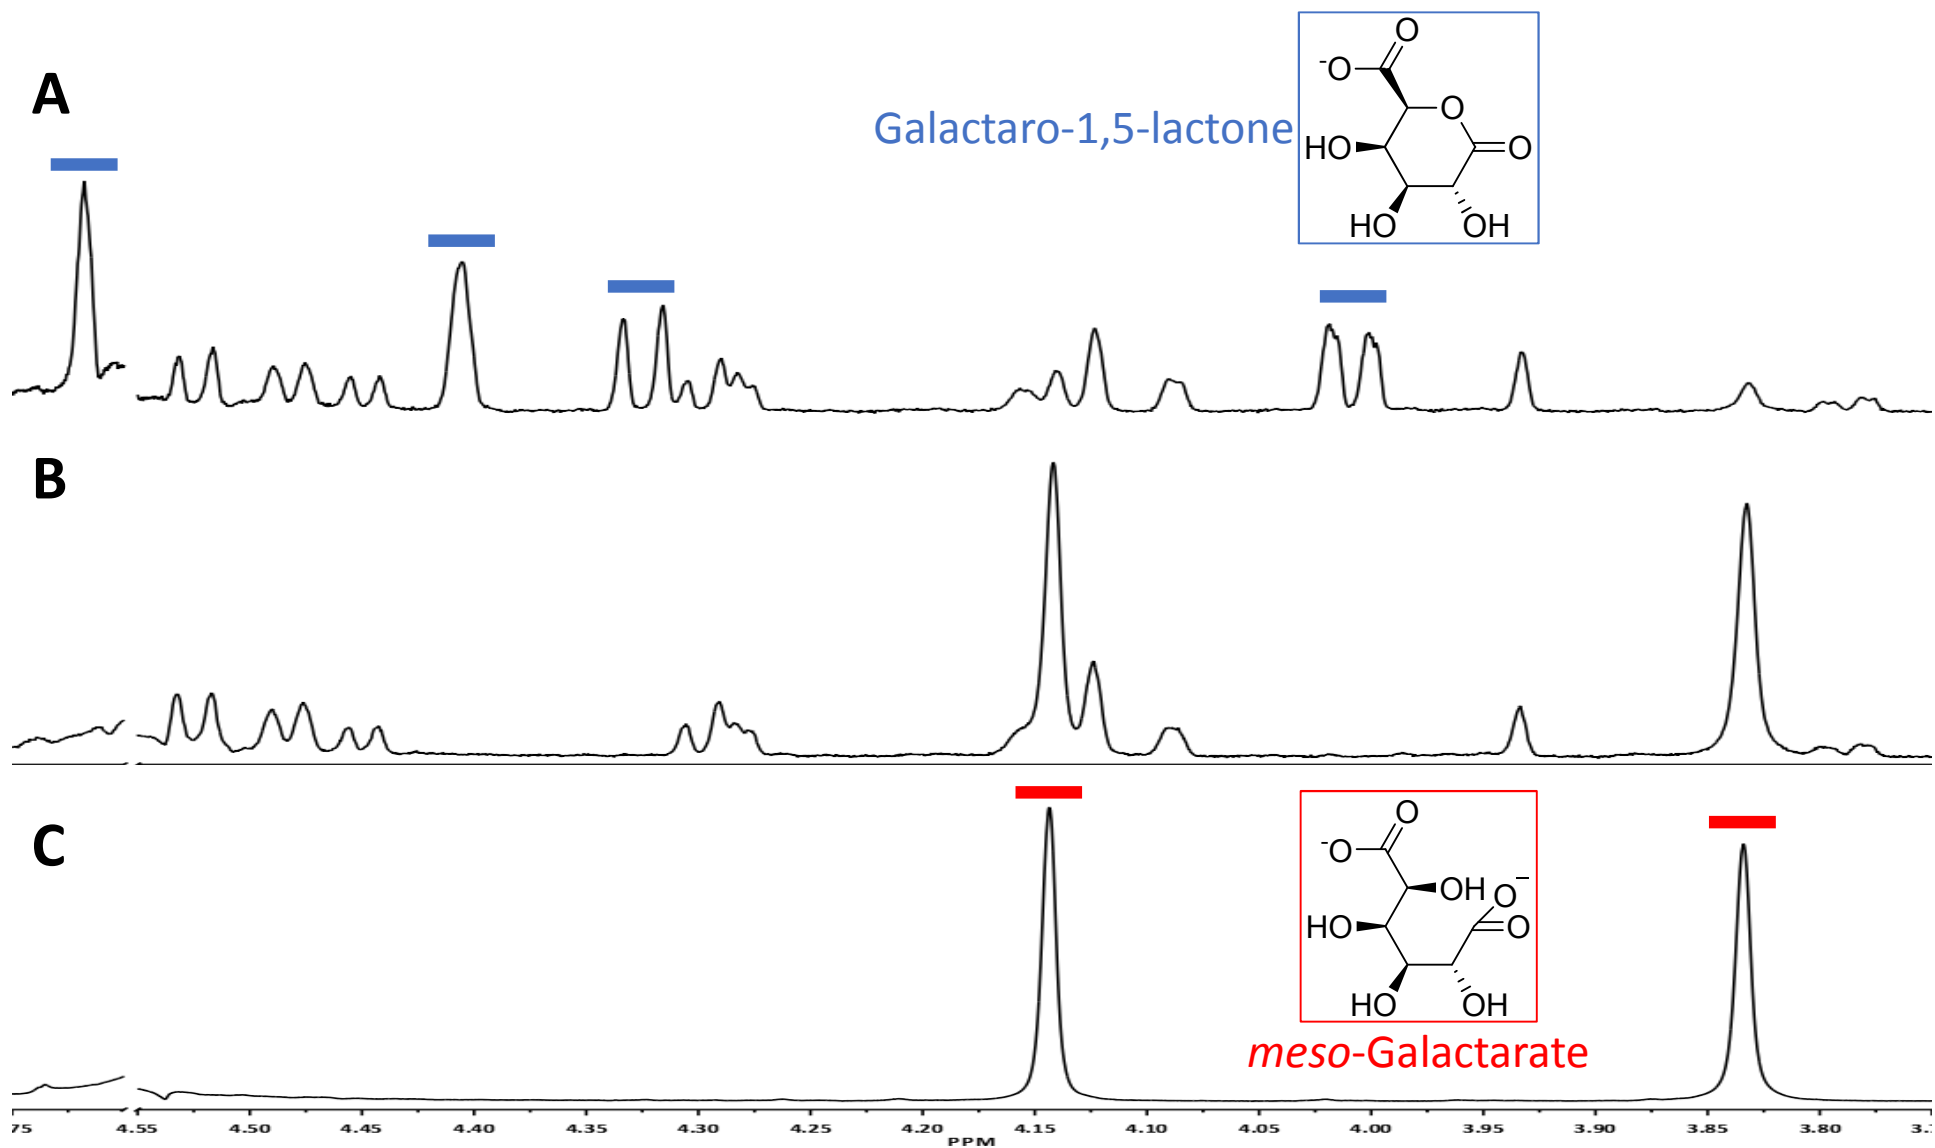

**FIG S4 Proton NMR spectra for activity screening of the lactone hydrolase Rpic\_4446 from *Ralstonia pickettii*.** (A)  $^1\text{H}$  NMR spectrum of a mixture of galactaro-1,5 & 1,4-lactones. The 1,5-lactone is unstable and converts to the 1,4-lactone spontaneously. (B) Spectrum 2 minutes after the addition of Rpic\_4446. The 1,4-lactone peaks remain, while two new peaks emerge. (C) Spectrum of pure *meso*-galactarate. The peaks in (B) match those of *meso*-galactarate, suggesting it to be the product of the lactone hydrolase reaction.

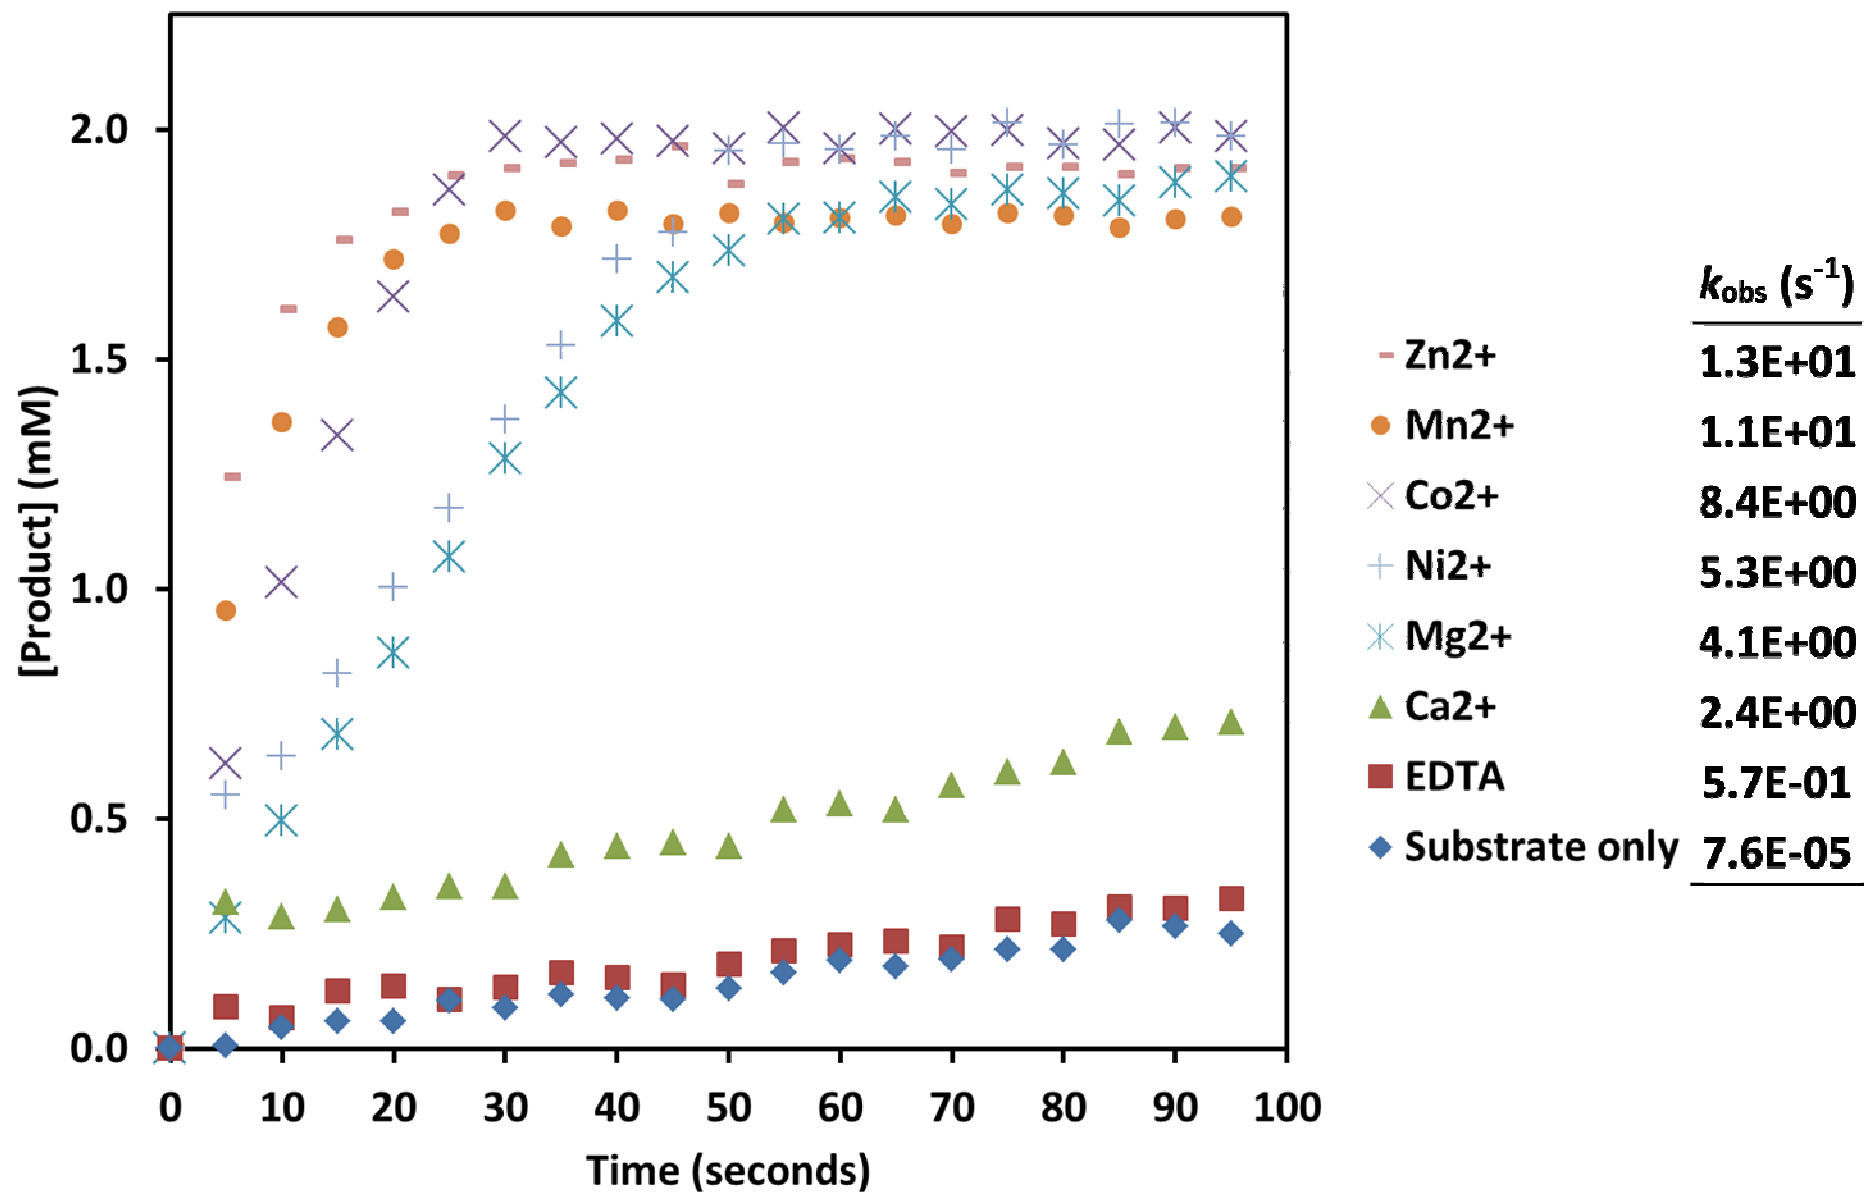

FIG S5 Metal screening of lactone hydrolase from *Ralstonia pickettii* 12J. The reaction was monitored in the presence of Zn<sup>2+</sup>, Mn<sup>2+</sup>, Co<sup>2+</sup>, Ni<sup>2+</sup>, Mg<sup>2+</sup>, Ca<sup>2+</sup>, and EDTA. Blue diamonds represent the progress curve for substrate only. Zn<sup>2+</sup> is the best activator.

Table S1. Reconstructed catabolic pathways and regulons for hexuronate and aldarate utilization in Proteobacteria.

(A) Distribution of transcriptional regulators, enzymes, and transporters involved in hexuronate/aldarate utilization in the analyzed genomes.

Table with columns: Proteobacterial Genomes, Regulators (GguR, GudR, GguR, UdhR), Upstream enzymes (Udh, UxuL, UxuF, Gci, Gli), Downstream enzymes (GarD, Guld, KgdD, KgsD/KgsD2, GarL, GarR), Transporters (UxuPQM, TctCAB, GarP (GudP), GguT, ExuT), Additional GguR-regulated genes (Pgl, AIdE, SerA, Agl, Omp, Exu-II).

Color abbreviations: Tested in this work: enzymes (UxuL, UxuF), transporters (TctC), and regulators (GguR, GudR)

genes in GguR regulons

genes in GudR regulons

genes in GguR regulons

genes in UdhR regulons

genes in chromosomal loci

genes in chromosomal loci

genes in chromosomal loci

genes in chromosomal loci

\* has Signal peptide (secreted enzyme)



Table S1. Reconstructed catabolic pathways and regulons for hexuronate and aldarate utilization in Proteobacteria.

(B) Reconstructed GguR regulons and predicted GguR-binding sites in the analyzed genomes.

| Genome                                     | TF locus tag                      | Target locus tag | Site position | Site score  | Site sequence      | Target putative operon                          |
|--------------------------------------------|-----------------------------------|------------------|---------------|-------------|--------------------|-------------------------------------------------|
| <b>Halomonadaceae</b>                      |                                   |                  |               |             |                    |                                                 |
| Chromohalobacter salexigens DSM 3043       | Csal_2473                         | Csal_2479        | -339          | 5.53        | ATGATGTATgACAaCAT  | uxuPQM-gci-gli-udh--gguR                        |
|                                            |                                   | Csal_2487        | -57           | 5.51        | ATGATGTATgACATgAT  | kdgD-gudD-TRAP-gudD                             |
| Halomonas elongata DSM 2581                | HELO_3403                         | HELO_3410        | -102          | 5.01        | ATGATGTATTAtAagAg  | uxuPQM-gci-gli-udh-X-gguR                       |
|                                            |                                   | HELO_3417        | -64           | 5.54        | ATGATGTATTACATgAg  | kdgD-tctCAB-garD-gudD-kgsD                      |
|                                            |                                   | HELO_3291        | -207          | 5.44        | ATGATGTATTACATgAa  | tctC2                                           |
| Halomonas boliviensis LC1                  | KUC_0336                          | KUC_0343         | -76           | 5.19        | ATGATGTATTACATagg  | kdgD-uxuPQM-gci-gli-udh-gguR-kgsD               |
|                                            |                                   | KUC_0348         | -203          | 5.39        | ATGATGTATTACATagT  | tctCAB-garD-gudD                                |
|                                            |                                   | KUC_0336         | -124          | <u>4.76</u> | AcGATaTAATACAaCcT  | gguR                                            |
| Halomonas lutea DSM 23508                  | F568_RS0106630,<br>F568_RS0114690 | F568_RS0106595   | -90           | 5.21        | ATGATGTATgACATaAg  | kdgD2-uxuPQM-gci-gli-udh-gguR                   |
|                                            |                                   | F568_RS0114660   | -87           | 4.81        | ATGATGTATgACAcCtT  | kdgD1-tctCAB-garD-gudD-gguR2-kgsD               |
| Halomonas zhanjiangensis DSM 21076         | D467_RS0112545                    | D467_RS0112560   | -38           | 5.18        | gTGATGTATTACAaCAT  | kdgD1-gli-udh-gguR-kgsD                         |
|                                            |                                   | D467_RS0112665   | -85           | 4.92        | ATGATGTATgACAaatT  | kdgD2-uxuPQM-gci                                |
|                                            |                                   | D467_RS0112585   | -314          | <u>4.39</u> | AatATGTATgACATgtg  | porin-kdgm-rhgT- pmeA-pelY                      |
| <b>Comamonadaceae</b>                      |                                   |                  |               |             |                    |                                                 |
| Acidovorax avenae subsp. citrulli AAC00-1  | Aave_2589                         | Aave_2589        | -37           | 5.22        | ATGTTGTCGTACAACGC  | gguR                                            |
|                                            |                                   | Aave_2590        | -18           | 5.22        | CGTTGTACGACAACAT   | udh-uxuL1-uxuPQM-garD-uxuL2-tctC2               |
|                                            |                                   | Aave_2588        | -37           | <u>4.73</u> | CAGTTGTATGATGACGT  | tctC1-kdgD                                      |
| Acidovorax avenae subsp. avenae ATCC 19860 | Acav_2614                         | Acav_2613        | -43           | 5.22        | gcGTTGTaCGACAACAT  | udh-uxuL1-uxuPQM-garD-uxuL2-tctC2               |
|                                            |                                   | Acav_2614        | -39           | 5.22        | ATGTTGTCGtACAACgc  | gguR                                            |
|                                            |                                   | Acav_2615        | -43           | 4.87        | AaGTTGTatGAtgAcgT  | tctC-kdgD                                       |
| Acidovorax sp. KKS102                      | C380_19540                        | C380_19535       | -68           | 4.84        | tcGTTGTatGACAACtg  | udh-uxuL1-uxuPQM-garD-X-aldE                    |
|                                            |                                   | C380_19540       | -71           | 4.84        | caGTTGTatGACAACgA  | gguR                                            |
|                                            |                                   | C380_19545       | -168          | 5.06        | ATGTTGTaCGAtgACAT  | kgsD                                            |
|                                            |                                   | C380_12430       | -348          | <u>4.54</u> | taGTcaTCGtACAACtg  | uxuF-tctC2                                      |
|                                            |                                   | C380_12435       | -146          | <u>4.77</u> | tGTTGTatGACgACAT   | tctC-kdgD-DUF4440-serA                          |
| Acidovorax sp. JS42                        | Ajs_1995                          | Ajs_1994         | -50           | 5.02        | ATGTTGTACGATGACGT  | tctC1-kdgD-tctC3-serA-gudD                      |
|                                            |                                   | Ajs_1995         | -38           | 5.22        | ATGTTGTCTGATAACGT  | gguR                                            |
|                                            |                                   | Ajs_1996         | -75           | 5.22        | ACGTTATCAGACAACAT  | gudD2-tctC2-garD-uxuL2                          |
| Acidovorax ebreus TPSY                     | Dtpsy_1795                        | Dtpsy_1795       | -38           | 5.14        | ATGTTGTcTtAtAACgT  | gguR                                            |
|                                            |                                   | Dtpsy_1796       | -78           | 5.14        | AcGTTaTaaGACAACAT  | gudD2-tctC2                                     |
|                                            |                                   | Dtpsy_1794       | -50           | 5.02        | ATGTTGTaCGAtgAcgT  | tctC1-kdgD-tctC3-serA-gudD                      |
| Alicyclophilus denitrificans BC            | Alide2_2884                       | Alide2_2883      | -21           | 4.73        | AaGTcaTcGACgACAT   | gudD2-tctC2-garD                                |
|                                            |                                   | Alide2_2884      | -103          | 4.73        | ATGTcGTCtGAtgAcTt  | gguR                                            |
|                                            |                                   | Alide2_2885      | -80           | 4.92        | ATGTTGTatGAtgACAT  | tctC1-kdgD-tctC3-serA-gudD-kgsD                 |
| Comamonas testosteroni KF-1 (old)          | CtesDRAFT_4119                    | CtesDRAFT_4118   | -79           | 5.38        | caGTTGTaCGACAACAT  | gudD2-tctC2-garD                                |
|                                            |                                   | CtesDRAFT_4119   | -81           | 5.38        | ATGTTGTCGtACAACtg  | gguR                                            |
|                                            |                                   | CtesDRAFT_4120   | -42           | <u>4.40</u> | taGTTGTatGAtgAcTg  | tctC1-kdgD-tctC3-X-serA-gudD-kgsD               |
| Comamonas testosteroni TK102               | O987_RS01225                      | O987_01220       | -79           | 5.38        | caGTTGTaCGACAACAT  | gudD2-tctC2-garD                                |
|                                            |                                   | O987_01225       | -81           | 5.38        | ATGTTGTCGtACAACtg  | gguR                                            |
|                                            |                                   | O987_01230       | -42           | <u>4.40</u> | taGTTGTatGAtgAcTg  | tctC1-kdgD-tctC3-tctC4-serA-gudD-kgsD           |
| Delftia acidovorans SPH-1                  | Daci_0253                         | Daci_0252        | -42           | 5.23        | CAGTTGTACGACAACGT  | tctC1-kdgD-tctC3-serA-gudD-kgsD                 |
|                                            |                                   | Daci_0253        | -25           | 5.48        | ACGTTGTCGTACAACCT  | gguR                                            |
|                                            |                                   | Daci_0254        | -74           | 5.48        | AAGTTGTACGACAACGT  | gudD2-tctC2-garD-uxuL2                          |
| Hylemonella gracilis ATCC 19624            | HGR_02458                         | HGR_02453        | -95           | 5.02        | tGTTGTaCGACAACtg   | udh-uxuPQM-gudD2-tctC3-uxuF-garD                |
|                                            |                                   | HGR_02458        | -105          | 5.02        | caGTTGTCGtACAACa   | gguR                                            |
|                                            |                                   | HGR_02463        | -112          | 4.91        | ATGTTGTaCGAtgAcTg  | kdgD-tctC1-tctC2-gudD                           |
| Polaromonas sp JS666                       | Bpro_3110                         | Bpro_3110        | -60           | <u>4.58</u> | AGTTGTCGTGATGACTG  | gguR                                            |
|                                            |                                   | Bpro_3109        | -96           | <u>4.58</u> | CAGTCATCAGACAACCT  | udh-uxuL1-uxuPQM-garD-garL-garR-tctC1-aldE      |
| Polaromonas naphthalenivorans CJ2          | Pnap_1590                         | Pnap_1590        | -57           | <u>4.68</u> | ACGTTGTCGTGATGACTC | gguR                                            |
|                                            |                                   | Pnap_1591        | -99           | <u>4.68</u> | GAGTCATCAGACAACGT  | udh-uxuL1-uxuPQM-kdgD-garD-kgsD-garL-garR-tctC1 |
| Variovorax paradoxus S110                  | Vapar_1727                        | Vapar_1726       | -39           | 5.02        | taGTTGTaCGACAACg   | udh-uxuL1-uxuPQM-garD-X-tctC3-uxuF-tctC2        |
|                                            |                                   | Vapar_1727       | -39           | 5.02        | cGTTGTCGtACAACtA   | gguR                                            |
|                                            |                                   | Vapar_1728       | -44           | <u>4.54</u> | taGTTGTaCGAtgAcTg  | tctC1-kdgD-DUF4440-gudD                         |
| Variovorax paradoxus EPS                   | Varpa_1898                        | Varpa_1897       | -148          | 5.02        | taGTTGTaCGACAACg   | udh-uxuL1-uxuPQM-garD-X-tctC4-uxuF-tctC2        |



|                                                            |                               |                               |                   |               |                    |                                      |
|------------------------------------------------------------|-------------------------------|-------------------------------|-------------------|---------------|--------------------|--------------------------------------|
| Leptothrix cholodnii SP-6                                  | Lcho_1116                     | Varpa_1898                    | -40               | 5.02          | cTGTTCGtACAACta    | gguR                                 |
|                                                            |                               | Varpa_1899                    | -78               | <u>4.54</u>   | taGTTGTaCGAtgACTg  | tctC1-kdgD-DUF4440-tctC3-gudD-X-kgsD |
|                                                            |                               | Lcho_2484                     | -66               | 5.70          | ATGTTGTACGACAACAT  | garD                                 |
|                                                            |                               | Lcho_1117                     | -65               | 5.10          | ATGTTGTACGATGACAT  | kdgD-gudD-kgsD-tctC1-serA-garL-garR  |
|                                                            |                               | Lcho_1115                     | -95               | 5.40          | ACGTTGTACGACAACCTG | udh-uxuPQM-uxuL2                     |
|                                                            |                               | Lcho_1116                     | -73               | 5.40          | CAGTTTCGtACAACGT   | gguR                                 |
| <b>Burkholderiaceae</b><br>Burkholderia phytotfirmans PsJN | Bphyt_4862; Bphyt_4100        | Bphyt_4100                    | -332              | 4.85          | AcGtTtGtCtGACGACag | gguR2                                |
|                                                            |                               |                               | -202              | 4.06          | AgGatGTCCGAtGACaa  |                                      |
|                                                            |                               | Bphyt_4101                    | -238              | 4.06          | ttGTCaTCGGACatCcT  | gguT-gudD-kdgD2                      |
|                                                            |                               |                               | -108              | 4.85          | ctGTCGTCaGACaACgT  |                                      |
|                                                            |                               | Bphyt_4856                    | -103              | 4.56          | AcGtTtaTCGtACaACTa | udh2-exuT2                           |
|                                                            |                               | Bphyt_4860                    | -191              | 4.67          | AgGTCaTCCTaCaACaT  | garL-garR                            |
|                                                            |                               |                               | -79               | 4.34          | AAGaCaTaCGACGACcT  |                                      |
|                                                            |                               | Bphyt_4861                    | -160              | 4.34          | AgGTCGTCGtAtGtCTT  | kgsD                                 |
|                                                            |                               |                               | -48               | 4.67          | AtGtTGTaGGAtGACcT  |                                      |
|                                                            |                               | Bphyt_4862                    | -69               | 4.86          | cAGTCGTCaGACGACgg  | gguR                                 |
|                                                            |                               | Bphyt_4864                    | -176              | 4.89          | AcGTCaTCCTaCaACaT  | kdgD-garP                            |
|                                                            |                               |                               | -81               | 4.65          | ttGtTGTaCGAtGACgT  |                                      |
|                                                            |                               | Bphyt_4865                    | -160              | 4.65          | AcGTCaTCGtACaACaa  | garD-udh-uxuL                        |
|                                                            |                               |                               | -65               | 4.89          | AtGtTGTaGGAtGACgT  |                                      |
|                                                            |                               | Bphyt_4868                    | -302              | 4.96          | AtGTCGTCGtACaACgT  | uxuPQM-omp                           |
| Burkholderia phymatum STM815                               | Bphy_6525                     | Bphy_6382                     | -67               | 4.58          | ATGTTGTACGATGACGC  | garD                                 |
|                                                            |                               | Bphy_6525                     | -51               | 4.51          | CGTTGTCGGACAACGT   | gguR                                 |
|                                                            |                               | Bphy_6526                     | -48               | 4.31          | TTGTTGTACGATGACCG  | kgsD                                 |
|                                                            |                               |                               | -171              | 4.49          | ATGTCATAGGATGTCTG  |                                      |
|                                                            |                               | Bphy_6527                     | -77               | 4.49          | CAGACATCCTATGACAT  | garL-garR-uxuF-gudD-kdgD             |
|                                                            |                               |                               | -200              | 4.31          | CGGTCATCGTACAACAA  |                                      |
|                                                            |                               | Bphy_6596                     | -92               | 4.75          | ATGTCGTCAGACAACCT  | garP                                 |
|                                                            |                               |                               | -223              | 4.86          | ACGTCGTCGTACAACCTG |                                      |
| Burkholderia ambifaria AMMD                                | Bamb_1043                     | Bamb_1041                     | -270              | 5.13          | AAGTCATCCGACGACTG  | gudD                                 |
|                                                            |                               | Bamb_1043                     | -107              | 5.13          | CAGTCGTCGGATGACTT  | gguR                                 |
|                                                            |                               | Bamb_2220                     | -86               | 5.12          | ATGTCATACGACGACAT  | gguT-uxuF                            |
|                                                            |                               | Bamb_3566                     | -106              | 4.80          | CAGTCGTCAGATAACGT  | exuT-agl-omp                         |
|                                                            |                               | Bamb_4675                     | -48               | 4.82          | ATGTCGtATGATGACTA  | garD                                 |
|                                                            |                               |                               | -153              | 4.65          | ATGTCATCGTACAACGA  |                                      |
|                                                            |                               | Bamb_4676                     | -207              | 4.82          | TAGTCATCATAACGACAT | kdgD                                 |
|                                                            |                               |                               | -102              | 4.65          | TCGTTGTACGATGACAT  |                                      |
|                                                            |                               | Bamb_4679                     | -239              | 5.00          | AcGTCGTCGtAtGACaT  | kgsD                                 |
|                                                            |                               | Bamb_4680                     | 28                | 5.00          | AtGTCaTaCGACGACgT  | garP                                 |
|                                                            |                               | Bamb_4904                     | -73               | 4.43          | ATGTAGTACGACGACGT  | pgl                                  |
|                                                            |                               | Bamb_6123                     | -341              | 4.59          | CAGTCATCCTATGACGA  | uxuPQM-uxuF2                         |
|                                                            |                               | Burkholderia vietnamiensis G4 | Bcep1808_1082     | Bcep1808_1081 | -333               | 5.13                                 |
| Bcep1808_1082                                              | -107                          |                               |                   | 5.13          | CAGTCGTCGGATGACTT  | gguR                                 |
| Bcep1808_2255                                              | -239                          |                               |                   | 5.12          | ATGTCATACGACGACAT  | uxuF                                 |
| Bcep1808_3560                                              | -49                           |                               |                   | 4.82          | ATGTCGtATGATGACTA  | garD                                 |
|                                                            | -155                          |                               |                   | 4.58          | ATGTCATCGTACAACGC  |                                      |
| Bcep1808_3561                                              | -198                          |                               |                   | 4.82          | TAGTCATCATAACGACAT | kdgD                                 |
|                                                            | -92                           |                               |                   | 4.58          | CGGTTGTACGATGACAT  |                                      |
| Bcep1808_3562                                              | -241                          |                               |                   | 5.00          | ACGTCGTCGtATGACAT  | kgsD                                 |
| Bcep1808_3563                                              | -26                           |                               |                   | 5.00          | ATGTCATACGACGACGT  | garP                                 |
| Bcep1808_3851                                              | -70                           |                               |                   | 4.51          | ATGTGATACGACGACGT  | pgl                                  |
| Bcep1808_6572                                              | -329                          |                               |                   | 4.78          | CAGTCATCCGACAACta  | uxuPQM                               |
| Burkholderia glumae BGR1                                   | bglu_1g09940;<br>bglu_2g00170 |                               |                   | bglu_1g09940  | -99                | 5.06                                 |
|                                                            |                               | bglu_2g00170                  | -276              | <u>4.05</u>   | AgGAcGTCTGACaACaa  | gguR2                                |
|                                                            |                               |                               | -67               | <u>4.03</u>   | ggGACaTCGGAtGACaT  |                                      |
|                                                            |                               | bglu_2g00180                  | -207              | 4.90          | ATGTCATCAGACAACGT  | gudD-kdgD                            |
|                                                            |                               | bglu_2g03700                  | -69               | 5.10          | AAGTTGTACGACGACAT  | garP                                 |
|                                                            |                               | bglu_2g03710                  | -212              | 5.10          | ATGTCGTCGTACAACCT  | kgsD                                 |
|                                                            |                               | bglu_2g03730                  | -186              | 4.83          | CAGTCATCATAACACAT  | kdgD                                 |
|                                                            |                               |                               | -75               | 5.10          | ATGTTGTACGATGACAT  |                                      |
|                                                            |                               | bglu_2g03740                  | -164              | 5.10          | ATGTCATCGTACAACAT  | garD                                 |
|                                                            |                               |                               | -53               | 4.83          | ATGTTGTATGATGACTG  |                                      |
|                                                            |                               | bglu_2g04250                  | -90               | 4.50          | AAGTGGTACGATGACTG  | exuT-agl-omp                         |
|                                                            |                               | bglu_2g05570                  | -114              | 4.76          | AAGTTATATGATGACGT  | uxuF                                 |
|                                                            |                               | bglu_2g07210                  | -77               | 4.93          | ATGTCATCGTATGACGT  | pgl                                  |
|                                                            |                               | bglu_2g13770                  | -497              | 4.83          | CAGTCGTCtTATAACAT  | uxuPQM                               |
| Burkholderia xenovorans LB400                              | Bxe_B1804                     | Bxe_B0539                     | -106              | 4.89          | CTGTCATCGTACAACAT  | gudD                                 |
|                                                            |                               | Bxe_B1798                     | -322              | 5.08          | ATGTCGTCGTACAACAT  | uxuPQM-omp                           |
|                                                            |                               | Bxe_B1801                     | -159              | 4.65          | ACGTCATCGTACAACAA  | garD-udh-uxuL                        |
|                                                            |                               |                               | -64               | 4.89          | ATGTTGTAGGATGACGT  |                                      |
|                                                            |                               | Bxe_B1802                     | -83               | 4.65          | TTGTTGTACGATGACGT  | kdgD-garP                            |
|                                                            |                               |                               | -178              | 4.89          | ACGTCATCCTACAACAT  |                                      |
|                                                            |                               | Bxe_B1804                     | -70               | 4.79          | CAGTCATCAGACGACGG  | gguR                                 |
| Bxe_B1805                                                  | -48                           | 4.67                          | ATGTTGTAGGATGACCT | kgsD          |                    |                                      |

|                                       |                 |                                   |                   |                  |                     |                  |                   |              |
|---------------------------------------|-----------------|-----------------------------------|-------------------|------------------|---------------------|------------------|-------------------|--------------|
|                                       |                 | Bxe_B1807                         | -103              | 4.56             | AcGTTaTCGtACaACTa   | udh2-exuT2       |                   |              |
| Burkholderia lata sp. 383             | Bcep18194_A4276 | Bcep18194_A4276                   | -107              | 5.13             | CAGTCGTCGGATGACTT   | gguR             |                   |              |
|                                       |                 | Bcep18194_A4275                   | -268              | 5.13             | AAGTCATCCGACGACTG   | gudD             |                   |              |
|                                       |                 | Bcep18194_A5498                   | -89               | 5.12             | ATGTCATACGACGACAT   | gguT-uxuF        |                   |              |
|                                       |                 | Bcep18194_B0327                   | -25               | 4.88             | ACGTCATACGACGACGT   | garP             |                   |              |
|                                       |                 | Bcep18194_B0328                   | -239              | 4.88             | ACGTCGTCGTATGACGT   | kgsD             |                   |              |
|                                       |                 | Bcep18194_B0332                   | -198              | 4.82             | TAGTCATCATAACGACAT  | kdgD             |                   |              |
|                                       |                 | Bcep18194_B0333                   | -92               | 4.65             | TCGTTGTACGATGACAT   | garD             |                   |              |
|                                       |                 |                                   | -154              | 4.65             | ATGTCATCGTACAACGA   |                  |                   |              |
|                                       |                 |                                   | -48               | 4.82             | ATGTCGTATGATGACTA   |                  |                   |              |
|                                       |                 |                                   |                   | Bcep18194_B1871  | -196                | 4.92             | CAGTCGTCAGATAACAT | exuT-agl-omp |
|                                       |                 | Bcep18194_C7436                   | -347              | 4.71             | CAGTCATCCTATGACAA   | uxuPQM           |                   |              |
| Burkholderia multivorans ATCC BAA-247 | NP80_1270       | NP80_1269                         | -194              | 5.06             | AAGTCaTCCGAtGACTg   | gudD             |                   |              |
|                                       |                 | NP80_1270                         | -108              | 5.06             | cAGTCaTCGGAtGACTT   | gguR             |                   |              |
|                                       |                 | NP80_2300                         | -98               | 5.12             | AtGTCaTaCGACGACaT   | gguT-uxuF        |                   |              |
|                                       |                 | NP80_3332                         | -77               | 4.50             | AAGTaGtACGAtGACaT   | pgl              |                   |              |
|                                       |                 | NP80_4291                         | -272              | 4.55             | AAGgCGTcTGACGACTT   | omp              |                   |              |
|                                       |                 | NP80_5140                         | -153              | 4.58             | AtGTCaTCGtACaACgC   | garD             |                   |              |
|                                       |                 |                                   | -47               | 4.82             | AtGTCGTatGAtGACTa   | kdgD             |                   |              |
|                                       |                 | NP80_5141                         | -199              | 4.82             | tAGTCaTCatACGACaT   |                  |                   |              |
|                                       |                 |                                   | -93               | 4.58             | gcGTtGTaCGAtGACaT   |                  |                   |              |
|                                       |                 | NP80_5150                         | -237              | 4.92             | AcGTCGTcAtAtGACaT   | kgsD             |                   |              |
|                                       |                 | NP80_5151                         | -27               | 4.92             | AtGTCaTatGACGACgT   | garP             |                   |              |
|                                       |                 | NP80_5675                         | -367              | 4.72             | cAGTCaTCCTAtaACgT   | uxuPQM           |                   |              |
|                                       |                 | NP80_5676                         | -177              | 4.72             | AcGTTaTaGGAtGACTg   | pgl*             |                   |              |
|                                       |                 | Burkholderia cepacia GG4          | GEM_2349          | GEM_1233         | -86                 | 5.12             | AtGTCaTaCGACGACaT | gguT-uxuF    |
|                                       |                 |                                   |                   | GEM_2349         | -106                | 5.13             | cAGTCGTCGGAtGACTT | gguR         |
| GEM_2350                              | -335            |                                   |                   | 5.13             | AAGTCaTCCGACGACTg   | gudD             |                   |              |
| GEM_5878                              | 30              |                                   |                   | 5.00             | AtGTCaTaCGACGACgT   | garP             |                   |              |
| GEM_5879                              | -239            |                                   |                   | 5.00             | AcGTCGTCGTAtGACaT   | kgsD             |                   |              |
| GEM_5882                              | -197            |                                   |                   | 4.82             | tAGTCaTCatACGACaT   | kdgD             |                   |              |
| GEM_5883                              | -50             |                                   |                   | 4.82             | AtGTCGTatGAtGACTa   | garD             |                   |              |
| Burkholderia cenocepacia AU 1054      | Bcen_0685       |                                   |                   | Bcen_0684        | -266                | 5.13             | AAGTCaTCCGACGACTg | gudD         |
|                                       |                 | Bcen_0685                         | -108              | 5.13             | cAGTCGTCGGAtGACTT   | gguR             |                   |              |
|                                       |                 | Bcen_3044                         | -25               | 5.00             | AtGTCaTaCGACGACgT   | garP             |                   |              |
|                                       |                 | Bcen_3045                         | -239              | 5.00             | AcGTCGTCGTAtGACaT   | kgsD             |                   |              |
|                                       |                 | Bcen_3049                         | -197              | 4.82             | tAGTCaTCatACGACaT   | kdgD             |                   |              |
|                                       |                 | Bcen_3050                         | -49               | 4.82             | GAtTCGTatGAtGACTa   | garD             |                   |              |
|                                       |                 | Bcen_4207                         | -196              | 4.92             | cAGTCGTCaGAtaACaT   | exuT-agl-omp     |                   |              |
|                                       |                 | Bcen_5663                         | -336              | 4.48             | cAGTCaTCCTAtaACgA   | uxuPQM           |                   |              |
|                                       |                 | Bcen_5896                         | -89               | 5.00             | AtGTCaTaCGACGACgT   | gguT-uxuF        |                   |              |
|                                       |                 | Cupriavidus taiwanensis LMG 19424 | RALTA_B0132       | RALTA_B0132      | -91                 | 4.83             | CTGTCATCGTATGACTG | gguR         |
| RALTA_B0133                           | -109            |                                   |                   | 4.83             | CAGTCATACGATGACAG   | gudD-tctC3-tctC1 |                   |              |
| RALTA_B0137                           | -301            |                                   |                   | 4.86             | AcGTTtGTcAGACaACaT  | kdgD-kgsD        |                   |              |
|                                       | -93             |                                   |                   | 4.78             | ttGTCGTaCGAtGACTg   |                  |                   |              |
| RALTA_B0782                           | -155            |                                   |                   | 4.66             | ATGTTGTCTGTAACAACAC | garD             |                   |              |
|                                       | -54             |                                   |                   | 4.86             | ATGTTGTCTGACACAACGT |                  |                   |              |
| Cupriavidus eutropha H16              | H16_B0126       | H16_B0965                         | -57               | 5.00             | AAGTTGTCTGACACAACGT | garD             |                   |              |
|                                       |                 |                                   | -157              | 4.60             | GTGTTATCGTACAACATA  |                  |                   |              |
|                                       |                 | H16_B0131                         | -94               | 4.71             | TTGTCATACGATGACTG   | kdgD-kgsD        |                   |              |
|                                       |                 |                                   | -289              | 4.85             | ACGTTGTCCTACAACAT   |                  |                   |              |
|                                       |                 | H16_B0126                         | -81               | 4.83             | CTGTCATCGTATGACTG   | gguR             |                   |              |
| H16_B0127                             | -90             | 4.83                              | CAGTCATACGATGACAG | gudD-tctC3-tctC1 |                     |                  |                   |              |
| Cupriavidus basilensis 4G11           | RR42_m1001      | RR42_m1000                        | -148              | 4.57             | AtGTTtGtAGGAtGtCTT  | kgsD             |                   |              |
|                                       |                 | RR42_m1001                        | -81               | 4.49             | cgGTCGTcAtAtaACTT   | gguR             |                   |              |
|                                       |                 | RR42_m1002                        | -35               | 4.49             | AAGTtaTatGACGACcg   | gudD-tctC3       |                   |              |
|                                       |                 | RR42_s1730                        | -97               | 4.67             | tAGTtGTaCGAtGACgT   | kdgD             |                   |              |
|                                       |                 | RR42_s1731                        | -107              | 5.07             | AAGTCaTaCGAtGACaT   | garP-garD        |                   |              |
|                                       |                 | RR42_s2695                        | -75               | 4.71             | tAGTCaTaGGAtGACgT   | serA-tctC1       |                   |              |
|                                       |                 | RR42_s2696                        | -214              | 4.71             | AcGTCaTCCTAtGACTa   | uxuL             |                   |              |
|                                       |                 | Cupriavidus eutropha JMP134       | Reut_B3714        | Reut_A1006       | -45                 | 5.00             | ATGTTGTATGACGACTG | tctC1        |
| -180                                  | 5.00            |                                   |                   |                  | ATGTCATCAGACAACAG   |                  |                   |              |
| Reut_B3688                            | -317            |                                   |                   | 5.02             | AtGTCGTCGTAtGACTg   | kdgD             |                   |              |
|                                       | -101            |                                   |                   | 4.67             | tAGTtGTaCGAtGACgT   |                  |                   |              |
| Reut_B3689                            | -284            |                                   |                   | 4.67             | AcGTCaTCGtACaACTa   | garP-garD        |                   |              |
|                                       | -68             |                                   |                   | 5.02             | cAGTCaTaCGACGACaT   |                  |                   |              |
| Reut_B3713                            | -96             |                                   |                   | 4.17             | AtGTCaTatGAtGtCcT   | kgsD             |                   |              |
| Reut_B3714                            | -80             |                                   |                   | 5.04             | CAGTCGTCGTATGACTT   | gguR             |                   |              |
| Reut_B3715                            | -87             | 5.04                              | AAGTCATACGACGACTG | gudD-tctC3       |                     |                  |                   |              |
| Cupriavidus metallidurans CH34        | Rmet_0833       | Rmet_0832                         | -98               | 4.53             | ATGTCATATGATGTCTT   | kgsD             |                   |              |
|                                       |                 | Rmet_0833                         | -30               | 4.68             | CGGTCGTCGTATGACTT   | gguR             |                   |              |
|                                       |                 | Rmet_0834                         | -80               | 4.68             | AAGTCATACGACGACCG   | gudD-tctC3       |                   |              |

|                                                    |                              |               |      |      |                    |                                |
|----------------------------------------------------|------------------------------|---------------|------|------|--------------------|--------------------------------|
|                                                    |                              | Rmet_4735     | -326 | 4.45 | AAGTCaTCGTACaACca  | garP-garD                      |
|                                                    |                              |               | -77  | 5.13 | AAGTCGTatGACGACaT  |                                |
|                                                    |                              | Rmet_4736     | -359 | 5.13 | AtGTCGTcAtACGACTT  | kdgD                           |
|                                                    |                              |               | -110 | 4.45 | tgGtTGTaCGAtGACTT  |                                |
|                                                    |                              | Rmet_0971     | -161 | 5.13 | AAGTCATCCGACGACTG  | tctC1                          |
| <i>Ralstonia pickettii</i> 12J                     | Rpic_0945                    | Rpic_0946     | -17  | 4.67 | GTGTTGTACGACGACTG  | gudD-exuT-agl-omp-aldE         |
|                                                    |                              | Rpic_0945     | -85  | 4.67 | CAGTCGTCGTACAACAC  | gguR                           |
| <i>Ralstonia solanacearum</i> GMI1000              | RSc1078                      | RSc1078       | -90  | 4.98 | CAGTCGTCGTACAACAT  | gguR                           |
|                                                    |                              | RSc1079       | -26  | 4.98 | ATGTTGTACGACGACTG  | gudD-exuT-agl-omp-aldE         |
| <b><i>Pseudomonadaceae</i></b>                     |                              |               |      |      |                    |                                |
| <i>Pseudomonas entomophila</i> L48                 | PSEEN0729, PSEEN2654         | PSEEN2654     | -63  | 4.80 | ATGTGATCGTACAACCTG | gguR2                          |
|                                                    |                              | PSEEN2658     | -71  | 5.50 | ATGTTGTACGATAACTT  | kdgD-garP-garD-kgsD            |
|                                                    |                              | PSEEN0730     | -105 | 5.30 | GTGTTGTGTACAACCTT  | gguT-gudD                      |
|                                                    |                              | PSEEN0729     | -201 | 5.30 | AAGTTGTACGACAACAC  | gguR1                          |
| <i>Pseudomonas mendocina</i> ymp                   | Pmen_3305                    | Pmen_1214     | -450 | 4.70 | ACGTTATCGTACAACAA  | gudD2-tctCBA                   |
|                                                    |                              |               | -251 | 5.10 | AGGTCATACGACAACAT  |                                |
|                                                    |                              | Pmen_1215     | -275 | 5.10 | ATGTTGTGTATGACCT   | kdgD-gudD-garP-garD-serA       |
|                                                    |                              |               | -76  | 4.70 | TTGTTGTACGATAACGT  |                                |
|                                                    |                              | Pmen_3299     | -316 | 4.80 | ACGTTGTACAACCTT    | udh-uxuL-uxuPQM-X              |
|                                                    |                              |               | -60  | 5.00 | AAGTCATACGACAACGT  |                                |
|                                                    |                              | Pmen_3306     | -54  | 4.80 | CAGTTGTACGATGACAC  | aldE                           |
|                                                    |                              | Pmen_3305     | -63  | 4.80 | GTGTCATCGTACAACCTG | gguR                           |
| <i>Pseudomonas putida</i> KT2440                   | PP4759, PP3603               | PP1173        | -251 | 4.82 | tAGTTGTACGACAACc   | omp                            |
|                                                    |                              | PP1171        | -43  | 5.10 | AAGTCATACGACAACCT  | udh-uxuL-uxuPQM-X-aldE         |
|                                                    |                              | PP3599        | -71  | 5.30 | AGGTTGTACGATAACTT  | kdgD-garP-garD-kgsD            |
|                                                    |                              | PP3603        | -47  | 4.60 | ATGTGATCGTACAACCG  | gguR2                          |
|                                                    |                              | PP4758        | -79  | 5.10 | ATCTTGTGTACAACCTT  | gguT-gudD                      |
|                                                    |                              | PP4759        | -104 | 5.10 | AAGTTGTACGACAAGAT  | gguR1                          |
| <i>Pseudomonas syringae</i> pv. tomato str. DC3000 | PSPTO3283, PSPTO4550         | PSPTO4549     | -77  | 5.10 | CAGTTGTACGATGACTT  | kdgD-garP-garD                 |
|                                                    |                              | PSPTO3323     | -163 | 5.10 | AAGTTGTACGATGACTG  | kgsD                           |
|                                                    |                              | PSPTO1054     | -297 | 4.85 | tgGTTGTACGACAACcT  | omp                            |
|                                                    |                              | PSPTO1053     | -48  | 5.10 | AAGTCATACGACAACAG  | udh-uxuL-uxuPQM-X-aldE         |
|                                                    |                              | PSPTO5219     | -385 | 4.20 | CAGTCATCGTATAACGA  | exuT                           |
|                                                    |                              |               | -265 | 5.60 | ATGTTGTACGACAACAT  |                                |
|                                                    |                              | PSPTO3283     | -128 | 3.81 | AgcTTGTAAcTACAgtTc | gguR1                          |
|                                                    |                              | PSPTO3284     | -358 | 3.81 | gAcTTGTATAcAAgtTc  | gguT-gudD                      |
| <i>Pseudomonas simiae</i> WCS417                   | PS417_18885, PS417_04180     | PS417_04195   | -79  | 4.78 | tAGTTaTACGAtgACgT  | kdgD-kgsD2-garP-garD           |
|                                                    |                              | PS417_17355   | -113 | 4.86 | gAGTcaTCGTaTAACTT  | omp                            |
|                                                    |                              |               | -55  | 5.20 | AtGTTGTACGACgACgT  |                                |
|                                                    |                              | PS417_17360   | -36  | 4.79 | tAGTcaTACGACAACcT  | udh-uxuL-uxuPQM-aldE           |
|                                                    |                              | PS417_14775   | -172 | 4.62 | ttGTcaTCCtACAACtG  | exuT-II                        |
|                                                    |                              |               | -63  | 5.01 | cAGTTGTACGACgACaT  |                                |
|                                                    |                              | PS417_18885   | -99  | 4.26 | tgGTTGTcATACAgtTT  | gguR2                          |
|                                                    |                              | PS417_18890   | -257 | 4.26 | AAcTTGTATgACAACca  | gguT-gudD                      |
| <i>Pseudomonas fluorescens</i> FW300-N1B4          | A1D17_RS05060, A1D17_RS10275 | A1D17_RS27150 | -117 | 5.23 | AAGTcaTCGTaTAACTT  | omp                            |
|                                                    |                              |               | -58  | 5.20 | AtGTTGTACGACgACgT  |                                |
|                                                    |                              | A1D17_RS27145 | -59  | 5.11 | AAGTcaTACGACAACcT  | udh-uxuL-aldE                  |
|                                                    |                              | A1D17_RS10260 | -80  | 5.11 | AAGTTGTACGAtgACcT  | kdgD-kgsD2-garP-garD           |
|                                                    |                              | A1D17_RS05065 | -283 | 4.36 | AAcTTGTATgACAACc   | gguT-gudD                      |
|                                                    |                              | A1D17_RS05060 | -101 | 4.36 | gtGTTGTcATACAgtTT  | gguR1                          |
|                                                    |                              | A1D17_RS30165 | -322 | 4.69 | cAGTTGTACGACgACg   | exuT-II                        |
| <i>Pseudomonas stutzeri</i> RCH2                   | Psest_0359                   | Psest_0373    | -394 | 5.03 | AcGTTaTCGTACAACtA  | gudD2-tctCBA                   |
|                                                    |                              |               | -179 | 4.68 | tAGTcGTACGACgACcT  |                                |
|                                                    |                              | Psest_0374    | -288 | 4.68 | AgGtGTCGTACgACTa   | kdgD-kgsD2-garP-garD-serA-aldE |
|                                                    |                              |               | -73  | 5.03 | tAGTTGTACGAtAACgT  |                                |
|                                                    |                              | Psest_0359    | -64  | 4.84 | tAGTTaTCGTACAACtG  | gguR                           |
|                                                    |                              | Psest_0365    | -49  | 4.52 | AtGTcaTATgACAACg   | udh-uxuL-uxuPQM                |
|                                                    |                              | Psest_2755    | -169 | 4.84 | AtGTcaTATgACAACaT  | uxuL2                          |
| <i>Pseudomonas poae</i> RE_1-1-14                  | H045_07225, H045_01025       | H045_01030    | -81  | 4.85 | tAGTTGTACGAtgACgT  | kdgD-kgsD2-garP-garD           |
|                                                    |                              | H045_07220    | -210 | 4.41 | AAcTTGTATgACAACaa  | gguT-gudD                      |
|                                                    |                              | H045_07225    | -69  | 4.41 | ttGTTGTcATACAgtTT  | gguR1                          |
|                                                    |                              | H045_11810    | -119 | 4.91 | tAGTcaTCGTaTAACTT  | omp                            |
|                                                    |                              |               | -61  | 5.38 | AtGTTGTACGACAACgT  |                                |
|                                                    |                              | H045_11815    | -39  | 5.11 | AAGTcaTACGACAACcT  | udh-uxuL-uxuPQM-aldE           |
|                                                    |                              | H045_09475    | -170 | 4.75 | ctGTcaTCCtACAACcT  | exuT-II                        |
|                                                    |                              |               | -61  | 5.01 | cAGTTGTACGACgACaT  |                                |

|                                                  |                    |                    |      |                   |                   |                        |
|--------------------------------------------------|--------------------|--------------------|------|-------------------|-------------------|------------------------|
| Pseudomonas veronii R02                          | PverR02_13105,     | PverR02_04575      | -81  | 4.85              | tAGTTGTACGAtgACgT | kdgD-kgsD2-garP-garD   |
|                                                  | PverR02_04555      | PverR02_13100      | -265 | 4.09              | tAcTTGTATGACAACaa | gguT-gudD              |
|                                                  |                    | PverR02_13105      | -70  | 4.09              | tTGTGTCaTACAAGTa  | gguR1                  |
|                                                  |                    | PverR02_20095      | -116 | 4.91              | tAGTcaTCGTatAACTT | omp                    |
|                                                  |                    |                    | -59  | 5.20              | AtGTTGTACGACgACgT |                        |
|                                                  |                    | PverR02_20100      | -39  | 4.79              | tAGTcaTACGACAACcT | udh-uxuL-uxuPQM-aldE   |
|                                                  |                    | PverR02_17090      | -171 | 4.57              | gtGTcaTCCtACAACtA | exuT-II                |
|                                                  |                    | -61                | 5.01 | cAGTTGTACGACgACaT |                   |                        |
| Pseudomonas chlororaphis PCL1606                 | PCL1606_22240,     | PCL1606_22240      | -96  | 4.76              | cAcTtaTCCGACAACtT | gguR1                  |
|                                                  | PCL1606_52090      | PCL1606_22260      | -275 | 4.76              | AAGTTGTCGGatAAgTg | gguT-gudD              |
|                                                  |                    | PCL1606_52060      | -78  | 4.79              | tAGTTGTACGAtgACcT | kdgD-kgsD2-garP-garD   |
|                                                  |                    | PCL1606_52090      | -62  | 4.36              | cgGTgaTCGTACAACtT | gguR2                  |
|                                                  |                    |                    |      |                   |                   |                        |
| Pseudomonas mandelii JR-1                        | OU5_1302, OU5_2584 | OU5_1302           | -80  | 4.36              | gtGTTGTCaTACAAGtT | gguR1                  |
|                                                  |                    | OU5_1304           | -230 | 4.36              | AAcTTGTATGACAACac | gguT-gudD              |
|                                                  |                    | OU5_2579           | -79  | 5.10              | AAGTTGTACGAtgACcT | kdgD-kgsD2-garP-garD   |
|                                                  |                    | OU5_6133           | -74  | 5.23              | AAGTcaTCGTatAACTT | omp                    |
|                                                  |                    |                    | -16  | 5.20              | AtGTTGTACGACgACgT |                        |
|                                                  |                    | OU5_6132           | -46  | 5.11              | AAGTcaTACGACAACcT | udh-uxuL-uxuPQM-X-aldE |
| Azotobacter vinelandii AvOP                      | Avin_05190         | Avin_05220         | -73  | 5.10              | AAGTcaTACGAtAACgT | kdgD-garP-garD-serA    |
|                                                  |                    | Avin_05180         | -120 | 4.63              | AAGTcaTAtGAtgACaT | gguR                   |
|                                                  |                    | Avin_05190         | -214 | 4.63              | AtGTcaTCaTatgACTT | kgsD                   |
|                                                  |                    |                    |      |                   |                   |                        |
| Binding sites experimentally tested in this work |                    | genes in divergons |      | 4.10              | weak sites        |                        |
|                                                  |                    | genes in divergons |      |                   |                   |                        |

Table S1. Reconstructed catabolic pathways and regulons for hexuronate and aldarate utilization in Proteobacteria.

(C) Reconstructed GudR regulons and predicted GudR-binding sites in the analyzed genomes.

| Genome                                     | TF locus tag         | Target locus tag | Site position       | Site  |                      | Target putative operon |
|--------------------------------------------|----------------------|------------------|---------------------|-------|----------------------|------------------------|
|                                            |                      |                  |                     | score | Site sequence        |                        |
| <b>Burkholderiales</b>                     |                      |                  |                     |       |                      |                        |
| Acidovorax avenae subsp. citrulli AAC00-1  | Aave_3625            | Aave_3625        | -110                | 5.9   | GGATGTTAACGTTAACATCC | gudR                   |
|                                            |                      | Aave_3624        | -40                 | 5.9   | GGATGTTAACGTTAACATCC | tctC3-gudD             |
| Acidovorax avenae subsp. avenae ATCC 19860 | Acav_3542            | Acav_3542        | -111                | 6.12  | GAATGTTAaCGtTAACATTC | gudR                   |
|                                            |                      | Acav_3540        | (-1286)             | 6.12  | GAATGTTAaCGtTAACATTC | tctC3-gudD             |
| Acidovorax sp. KKS102                      | C380_15215           | C380_15215       | -130                | 5.61  | tAATGTTAaCGtTAACATca | gudR                   |
|                                            |                      | C380_15210       | -110                | 5.61  | tgATGTTAaCGtTAACATTa | kdgD-tctC3-gudD        |
| Polaromonas sp. JS666                      | Bpro_4527, Bpro_3418 | Bpro_4527        | -24                 | 4.9   | GCAAGTTAGCGTTAACATCA | gudR2                  |
|                                            |                      | Bpro_4526        | -79                 | 5.9   | AATTGTTAGCGCTAACATTC | tctC2                  |
|                                            |                      | Bpro_3418        | -33                 | 5.2   | GACTGGTAGCGCTATCGTCG | gudR1                  |
|                                            |                      | Bpro_3419        | -29                 | 6     | AAAAGGTAGCGCTACCATTC | kdgD-tctC3-gudD-kgsD   |
|                                            | -2                   | 5.5              | CAATGGTAGCGCTACCTTA |       |                      |                        |
| Polaromonas naphthalenivorans CJ2          | Pnap_1131            | Pnap_1130        | -93                 | 5.7   | AAATGTTACCGATAACATTG | gudD                   |
|                                            |                      | Pnap_1131        | -67                 | 4.67  | tgccGgTAtCGgTAtCATTC | gudR                   |
| Delftia acidovorans SPH-1                  | Daci_4288            | Daci_4288        | -131                | 4.95  | aAATGaTAtCGtTgtCATTt | gudR                   |
|                                            |                      | Daci_4289        | -118                | 4.95  | aAATGacAaCGaTAtCATTt | tctC3                  |

Binding sites experimentally tested in this work

|                    |               |     |              |
|--------------------|---------------|-----|--------------|
|                    | (transposase) | 4.1 | weak sites   |
| genes in divergons |               |     |              |
| genes in divergons |               |     |              |
|                    |               |     | tandem sites |
|                    |               |     | tandem sites |

Table S1. Reconstructed catabolic pathways and regulons for hexuronate and aldarate utilization in Proteobacteria.

(D) Reconstructed GulR regulons and predicted GulR-binding sites in the analyzed genomes.

| Genome                                                           | TF locus tag | Target locus tag | Site position | Site score | Site sequence         | Target putative operon                       |      |
|------------------------------------------------------------------|--------------|------------------|---------------|------------|-----------------------|----------------------------------------------|------|
| <u>GulR regulon in Ralstonia spp.</u><br>Ralstonia pickettii 12J | Rpic_4453    | Rpic_4452        | -339          | 5.37       | TCGATTCAAAAacgGTATgGA | kdgD-kgsD-garP-gudD2-garD-udh-uxuL-exuT2     |      |
|                                                                  |              |                  | -104          | 5.69       | TCaATACAAGTTcTGTATtaA |                                              |      |
|                                                                  |              | Rpic_4453        | -256          | 5.69       | TtaATACAgAAcTTGTATtGA |                                              | gulR |
|                                                                  |              |                  | -21           | 5.37       | TCcATACcgtTTTTGAATCGA |                                              |      |
| Ralstonia solanacearum GMI1000                                   | RSp0823      | RSp0823          | 92            | 5.06       | TCGATAAcgTTTTGAATCGA  | gulR                                         |      |
|                                                                  |              | RSp0824          | -111          | 5.06       | TCGATTCAAAAcgTaTATCGA | uxuL2                                        |      |
|                                                                  |              | RSp0826          | -109          | 6.05       | TCGATTCAAAAaaTGAATtGA | kdgD-kgsD-garP-gudD2-garD-udh-uxuL-pgl-exuT2 |      |

**Table S1. Reconstructed catabolic pathways and regulons for hexuronate and aldarate utilization in Proteobacteria.**

**(D) Reconstructed UdhR regulons and predicted UdhR-binding sites in the analyzed genomes.**

| Genome                                          | TF locus tag    | Target locus tag | Site position | Site score | Site sequence       | Target putative operon |
|-------------------------------------------------|-----------------|------------------|---------------|------------|---------------------|------------------------|
| <b><u>UdhR regulon in Burkholderia spp.</u></b> |                 |                  |               |            |                     |                        |
| Burkholderia phymatum STM815                    | Bphy_5674       | Bphy_5673        | -40           | 6.5        | TcGGAAAACGTTTTCCtA  | udh                    |
|                                                 |                 | Bphy_5674        | -107          | 6.5        | TaGGAAAACGTTTTCCgA  | udhR                   |
|                                                 |                 | Bphy_5675        | -136          | 6.5        | TaGaAAAACGTTTTCCAA  | exuT                   |
| Burkholderia ambifaria AMMD                     | Bamb_5235       | Bamb_5235        | -156          | 6.6        | TcGGAAAACGTTTTCCAA  | udhR                   |
|                                                 |                 | Bamb_5236        | -87           | 6.6        | TTGGAAAACGTTTTCCgA  | udh                    |
|                                                 |                 | Bamb_5234        | -145          | 6.2        | TTGaAAAACGTTTTCCAt  | exuT                   |
| Burkholderia lata sp. 383                       | Bcep18194_B2717 | Bcep18194_B2716  | -52           | 6.6        | TTGGAAAACGTTTTCCgA  | udh                    |
|                                                 |                 | Bcep18194_B2717  | -158          | 6.6        | TcGGAAAACGTTTTCCAA  | udhR                   |
|                                                 |                 | Bcep18194_B2718  | -133          | 5.8        | cTGA AAAACGTTTTCCAg | exuT                   |
| Burkholderia multivorans ATCC BAA-247           | NP80_3553       | NP80_3553        | -156          | 6.33       | gcGGAAAACGTTTTCCAA  | udhR                   |
|                                                 |                 | NP80_3554        | -61           | 6.33       | TTGGAAAACGTTTTCCgc  | udh                    |
|                                                 |                 | NP80_3552        | -130          | 6.2        | TTGaAAAACGTTTTCCAt  | exuT                   |
| Burkholderia cepacia GG4                        | GEM_5231        | GEM_5230         | -64           | 6.2        | TTGGAAAACGTTTTCCgg  | udh                    |
|                                                 |                 | GEM_5231         | -47           | 6.2        | ccGGAAAACGTTTTCCAA  | udhR                   |
|                                                 |                 | GEM_5232         | -142          | 6.2        | TTGaAAAACGTTTTCCAg  | exuT                   |
| Burkholderia vietnamiensis G4                   | Bcep1808_3988   | Bcep1808_3988    | -156          | 6.2        | ccGGAAAACGTTTTCCAA  | udhR                   |
|                                                 |                 | Bcep1808_3989    | -88           | 6.2        | TTGGAAAACGTTTTCCgg  | udh                    |
|                                                 |                 | Bcep1808_3987    | -143          | 6.08       | TgGaAAAACGTTTTCCAc  | exuT                   |

**Table S2. (A) Primers used for cloning of analyzed transcriptional regulators.**

| Gene locus tag | Uniprot ID | Direction / Restriction site      | Gene name   | Primer sequence                                                                    |
|----------------|------------|-----------------------------------|-------------|------------------------------------------------------------------------------------|
| Rpic_0945      | B2U998     | forward / NdeI<br>reverse / BamHI | <i>gguR</i> | GAGACCATATGCCACCCGCGAGTTC<br>CGTACAACATGGATCCGTATTGGCCGG                           |
| Bpro_3110      | Q128L8     | forward / NdeI<br>reverse / BamHI | <i>gguR</i> | CATTTGCTTGTCAACGGTTTTCATATGACCCTCAGGAAAACC<br>GCAACAGAGGTGTACGGATCCAGTCAGGCCTGGTTC |
| Bpro_3418      | Q127G5     | forward / NdeI<br>reverse / BamHI | <i>gudR</i> | CGTCGATAGAATCGGCATATGAACCACGAGGAC<br>GTGGTGGGATCCAAATGCGGGGTCACTC                  |

**(B) Primers used for cloning of analyzed lactonases and TctC transporters.**

| Gene locus tag  | Uniprot ID | Direction / Restriction site | Gene name   | Primer sequence                                                                  |
|-----------------|------------|------------------------------|-------------|----------------------------------------------------------------------------------|
| Rpic_4446       | B2UIY8     | forward /<br>reverse /       | <i>uxuL</i> | TACTTCCAATCCATGGATGGCGTTTGAATGGTGCTTG<br>TATCCACCTTTACTGTTACTACTCCCCTACCTGGCGC   |
| PSPTO_1052      | Q888H2     | forward /<br>reverse /       | <i>uxuL</i> | TACTTCCAATCCATGGATGCCGAAGTATAGTCGATGC<br>TATCCACCTTTACTGTTAGCCCTGAAAACGGGTTCCTC  |
| Bcep1808_2255   | A4JG52     | forward /<br>reverse /       | <i>uxuF</i> | TACTTCCAATCCATGCCGAACACTGATCGCCTGAC<br>TATCCACCTTTACTGTTAAATCATCGCGATCCAGTTCGCAC |
| BMULJ_02167     | A9AG49     | forward /<br>reverse /       | <i>uxuF</i> | TACTTCCAATCCATGCCGAACACTGACCTTCCGAC<br>TATCCACCTTTACTGTTAGACGATCGCGATCCAGTTCG    |
| Bcep18194_A5499 | Q39EM3     | forward /<br>reverse /       | <i>uxuF</i> | TACTTCCAATCCATGCCGAACACTGACCCGCGC<br>TATCCACCTTTACTGTTAGACGATCGCGACCCAGTTC       |
| PSPTO_2765      | Q881W7     | forward /<br>reverse /       | <i>uxuF</i> | TACTTCCAATCCATGGTGCAGGCAGTACCTTCG<br>TATCCACCTTTACTGTTATTTGTCCGGTGGCTGAGC        |
| Bpro_3101       | Q128M7     | forward /<br>reverse /       | <i>tctC</i> | TACTTCCAATCCATGCCAAACGCCAAACTGGCCGC<br>TATCCACCTTTACTGTTACTCCAGCTTGATACCCGCG     |

**(C) Candidate regulator-binding sites tested by DNA-binding assays.**

| Regulator        | Organism <sup>1</sup> | First gene locus tag <sup>2</sup> | Regulated operon                                  | DNA fragments used in EMSA and FPA DNA-binding assays <sup>3</sup>                                                            |
|------------------|-----------------------|-----------------------------------|---------------------------------------------------|-------------------------------------------------------------------------------------------------------------------------------|
| <b>FPA</b>       |                       |                                   |                                                   |                                                                                                                               |
| Bpro_3110 (GguR) | POL                   | Bpro_3109                         | <i>udh-uxuL1-uxuPQM-garD-garL-garR-tctC1-aldE</i> | a c c c c C A G T C A T C A G A C A C C T c c c c c                                                                           |
| Rpic_0945 (GguR) | RP                    | Bpro_3110 (NC)                    | -                                                 | a c c c c a t a a g a g t a c a c t c c c c c                                                                                 |
|                  |                       | Rpic_0946                         | <i>gudD-exuT-agl-omp-aldE</i>                     | a c c c c G T T G T A C G A C G A C T G c c c c c                                                                             |
|                  |                       | Rpic_0946 (NC)                    | -                                                 | a c c c c a t g t t a c a c g c a c c g t a c c c c                                                                           |
| <b>EMSA</b>      |                       |                                   |                                                   |                                                                                                                               |
| Rpic_0945 (GguR) | RP                    | Rpic_0946                         | <i>gudD-exuT-agl-omp-aldE</i>                     | g g g g g a t a g t c g c a t c c g t g t g t a c g a c g a c t g a t g a c a t a c g t g g g g g                             |
| Bpro_3418 (GudR) | POL                   | Bpro_3419 (sites 1&2)             | <i>kdgD-tctC4-gudD-kgsD</i>                       | g g g g g t t c A A A A G G T A G C G C T A C C A T T C a a g g e t t c A A T G G T A G C G C T A C C T T T A c c t g g g g g |

<sup>1</sup> RP, *Ralstonia pickettii* 12J; POL, *Polaromonas* sp. JS666.

<sup>2</sup> NC, a negative control DNA fragments contain scrambled sequence of the original target DNA fragment.

<sup>3</sup> Candidate binding sites are capitalized. For each DNA fragment, two complimentary single-stranded oligonucleotides have been synthesized by IDT.

The fragments were 5' labeled by either 6-carboxyfluorescein (for FP) or biotin (for EMSA) as marked by red letters.

**(D) Primers used for RT-qPCR in *Ralstonia pickettii* 12J.**

| Gene locus tag           | Gene name    | Direction | Primer sequence          |
|--------------------------|--------------|-----------|--------------------------|
| <b>(I) GguR regulon</b>  |              |           |                          |
| Rpic_4453                | <i>gulR</i>  | forward   | ATTGACGCTGAAGGAGATGGTG   |
|                          |              | reverse   | CACGGCACGGCAATCAG        |
| Rpic_4452                | <i>kdgD</i>  | forward   | GTCTACAACCGCCCAACC       |
|                          |              | reverse   | GGCCCGGCATAGGTAAG        |
| Rpic_4451                | <i>kgsD</i>  | forward   | TCCGCATATTCAGGCAGTGG     |
|                          |              | reverse   | AGTGCCTCGGGCAACAGG       |
| Rpic_4450                | <i>garP</i>  | forward   | TGGCGGTCGTGGAGAG         |
|                          |              | reverse   | GTTTCGGACCTCAGCCTTG      |
| Rpic_4449                | <i>gudD2</i> | forward   | TTGCCGATTTCAAGCTCAAGG    |
|                          |              | reverse   | TGAGCGACCATGCACCATTC     |
| Rpic_4448                | <i>garD</i>  | forward   | GCCGGTCTGCGTCTG          |
|                          |              | reverse   | CTGGCGCTTTCAGATGTT       |
| Rpic_4447                | <i>udh</i>   | forward   | GTTCCGACGCTCGAACCC       |
|                          |              | reverse   | GCTGTTCCGCAACACCTTG      |
| Rpic_4446                | <i>uxuL</i>  | forward   | CCGCTCGGCAAGCTGTATC      |
|                          |              | reverse   | ATGTCGTAATCGAAGGCCAGAC   |
| Rpic_4445                | <i>exuT2</i> | forward   | TGTGGAGCGTGTGGTTC        |
|                          |              | reverse   | CGACAGAAAGCGCGGAATG      |
| <b>(II) GguR regulon</b> |              |           |                          |
| Rpic_0945                | <i>gguR</i>  | forward   | GTCGCCATTGAGACGGAGTG     |
|                          |              | reverse   | GAGGTGGCGCTGTCGTTG       |
| Rpic_0946                | <i>gudD</i>  | forward   | CGTGCGCCACGAAGAAG        |
|                          |              | reverse   | ATCGCGGCTCAGCACAC        |
| Rpic_0947                | <i>exuT2</i> | forward   | TCTACCGTTCGCCGAAAGACC    |
|                          |              | reverse   | AGCGCAATCGCCAGAAAC       |
| Rpic_0948                | <i>agl</i>   | forward   | GGGTGCTGATTTGCGATG       |
|                          |              | reverse   | GCTCTGACGTTGGCCTTCC      |
| Rpic_0949                | <i>omp</i>   | forward   | CCCACGTTTGGCGTCTC        |
|                          |              | reverse   | AACGCCTGGTAGTCATAACGCATC |
| Rpic_0950                | <i>aldE</i>  | forward   | AACTCGGCTTGCCTATGTG      |
|                          |              | reverse   | TGCGGGCGAAATATGGATG      |



**Table S3. Database identifiers for proteins characterized in this work.**

| <b>Locus tag</b> | <b>UniProt Accession</b> | <b>Name</b> | <b>Genbank Accession</b> | <b>Current Genbank annotation</b>           | <b>Newly proposed annotation</b>                                           |
|------------------|--------------------------|-------------|--------------------------|---------------------------------------------|----------------------------------------------------------------------------|
| Bcep1808_2255    | A4JG52                   | UxuF        | ABO55255                 | 3-carboxymuconate cyclase-like protein      | Uronate lactonase, PF10282 family                                          |
| Bcep18194_A5499  | Q39EM3                   | UxuF        | ABB09093                 | 3-carboxymuconate cyclase-like protein      | Uronate lactonase, PF10282 family                                          |
| BMULJ_02167      | A9AG49                   | UxuF        | BAG44069                 | 6-phosphogluconolactonase                   | Uronate lactonase, PF10282 family                                          |
| Bpro_3101        | Q128M7                   | TctC        | ABE45015                 | Uncharacterized protein UPF0065             | Substrate binding protein of aldarate transporter, TTT family              |
| Bpro_3110        | Q128L8                   | GguR        | ABE45024                 | transcriptional regulator, GntR family      | Transcriptional regulator for hexuronate/aldarate utilization, GntR family |
| Bpro_3418        | Q127G5                   | GudR        | ABE45327                 | transcriptional regulator, LacI family      | Transcriptional regulator for glucarate utilization, LacI family           |
| PSPTO_1052       | Q888H2                   | UxuL        | AAO54583                 | senescence marker protein-30 family protein | Uronate lactonase, PF08450 family                                          |
| PSPTO_2765       | Q881W7                   | UxuF        | AAO56265                 | conserved hypothetical protein              | Uronate lactonase, PF10282 family                                          |
| Rpic_0945        | B2U998                   | GguR        | ACD26095                 | GntR domain protein                         | Transcriptional regulator for hexuronate/aldarate utilization, GntR family |
| Rpic_4446        | B2UIY8                   | UxuL        | ACD29539                 | SMP-30/Gluconolactonase/LRE domain protein  | Uronate lactonase, PF08450 family                                          |
